# Supplementary material for: Laminar N-Doped Carbon Materials from a Biopolymer for Use as a Catalytic Support for Hydrodechlorination Catalysts
Source: MDPI journal article supplement (doi:10.3390/ma14113107), 2021-06-05
Supplement: s1 [file s1]

# Laminar N-Doped Carbon Materials from a Biopolymer for Use as a Catalytic Support for Hydrodechlorination Catalysts

Cristina Ruiz-García <sup>1,2</sup> and Miguel A. Gilarranz <sup>1,\*</sup>

<sup>1</sup> Chemical Engineering Department, Faculty of Sciences, Universidad Autónoma de Madrid (UAM), Cantoblanco, 28049 Madrid, Spain

<sup>2</sup> CIEMAT, Av. Complutense 40, 28040 Madrid, Spain; cristina.ruiz@ciemat.es

\* Correspondence: miguel.gilarranz@uam.es

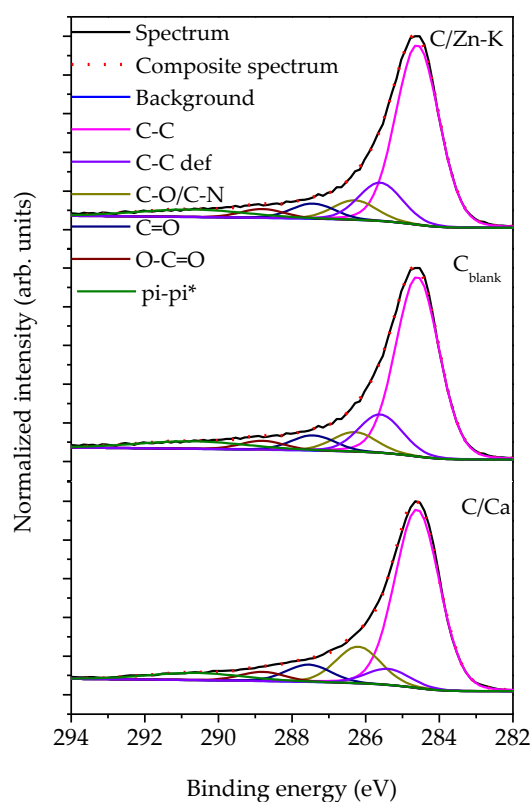

**Figure S1.** Deconvolution of XPS of C 1s spectra.

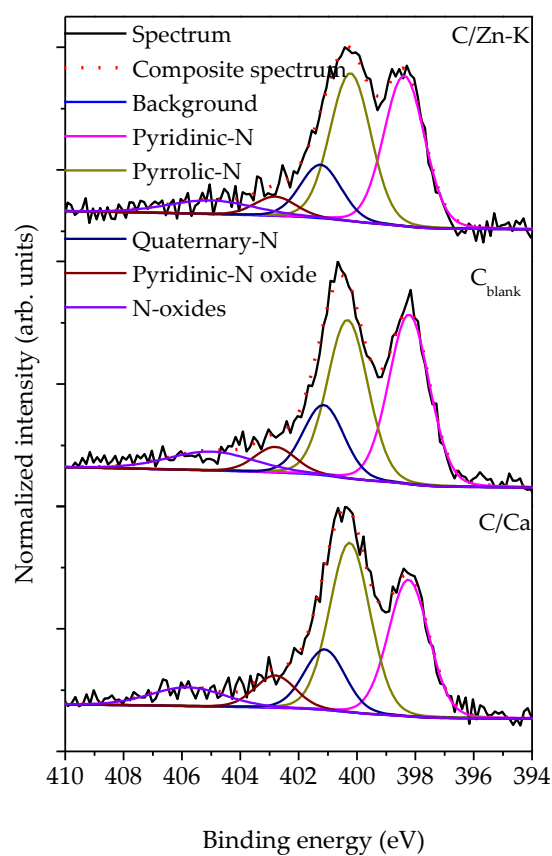

**Figure S2.** Deconvolution of XPS of N 1s spectra.

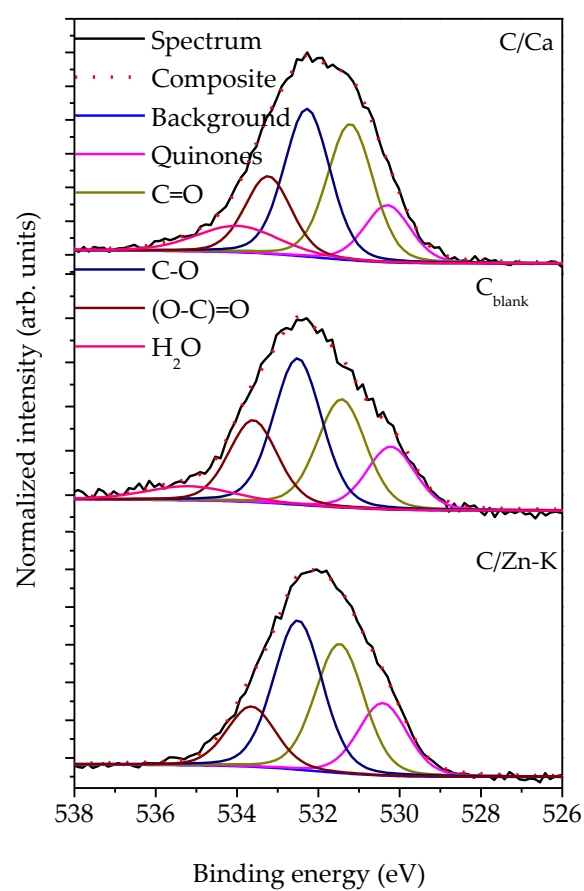

**Figure S3.** Deconvolution of XPS of O 1s spectra.
